# Supplementary material for: Factors influencing age of common allergen introduction in early childhood
Source: Frontiers journal article supplement (doi:10.3389/fped.2023.1207680), 2023-07-11
Supplement: Table_1.pdf [file Table_1.pdf]

**Supplemental Table 1. Factors Associated with Time to Introduction of Peanut and Egg by Survival Analysis**

| Variable                 | n (%)     | Univariable                        |              |                                    |             | Multivariable                      |              |                                    |             |
|--------------------------|-----------|------------------------------------|--------------|------------------------------------|-------------|------------------------------------|--------------|------------------------------------|-------------|
|                          |           | Peanut                             |              | Egg                                |             | Peanut                             |              | Egg                                |             |
|                          |           | HR<br>[CI]                         | P            | HR<br>[CI]                         | P           | HR<br>[CI]                         | P            | HR<br>[CI]                         | P           |
| Female                   | 232 (47%) | 0.9<br>[0.74, 1.08]                | 0.3          | 0.88<br>[0.73, 1.06]               | 0.2         | 0.96<br>[0.78, 1.17]               | 0.7          | 0.93<br>[0.77, 1.13]               | 0.5         |
| Race                     |           |                                    |              |                                    |             |                                    |              |                                    |             |
| White                    | 348 (70%) | —                                  | —            | —                                  | —           | —                                  | —            | —                                  | —           |
| Black                    | 8 (1.6%)  | <b>0.3</b><br><b>[0.14, 0.64]</b>  | <b>0.002</b> | <b>0.42</b><br><b>[0.21, 0.86]</b> | <b>0.02</b> | <b>0.27</b><br><b>[0.11, 0.69]</b> | <b>0.006</b> | 0.48<br>[0.21, 1.09]               | 0.08        |
| Asian                    | 84 (17%)  | <b>0.66</b><br><b>[0.51, 0.86]</b> | <b>0.002</b> | <b>0.73</b><br><b>[0.57, 0.94]</b> | <b>0.02</b> | <b>0.64</b><br><b>[0.47, 0.86]</b> | <b>0.003</b> | <b>0.74</b><br><b>[0.55, 0.97]</b> | <b>0.03</b> |
| Other Race               | 48 (10%)  | 0.81<br>[0.59, 1.12]               | 0.2          | 0.82<br>[0.60, 1.12]               | 0.2         | 0.84<br>[0.60, 1.19]               | 0.3          | 0.87<br>[0.62, 1.21]               | 0.4         |
| Hispanic or Latino       | 23 (4.7%) | 0.99<br>[0.65, 1.50]               | 0.9          | 0.81<br>[0.52, 1.24]               | 0.3         | 0.89<br>[0.57, 1.39]               | 0.6          | 0.76<br>[0.49, 1.20]               | 0.2         |
| Gestational Age          |           |                                    |              |                                    |             |                                    |              |                                    |             |
| >37 Weeks                | 448 (91%) | —                                  | —            | —                                  | —           | —                                  | —            | —                                  | —           |
| 33-37 Weeks              | 43 (9%)   | 0.97<br>[0.69, 1.36]               | 0.8          | 0.87<br>[0.63, 1.20]               | 0.4         | 1.00<br>[0.70, 1.44]               | 1.0          | 0.83<br>[0.59, 1.17]               | 0.3         |
| 25-32 Weeks              | 3 (0.6%)  | 1.18<br>[0.38, 3.67]               | 0.8          | 1.39<br>[0.45, 4.33]               | 0.6         | 0.99<br>[0.31, 3.20]               | 1.0          | 1.11<br>[0.35, 3.55]               | 0.9         |
| Eczema                   | 250 (51%) | 0.91<br>[0.76, 1.1]                | 0.3          | 0.91<br>[0.76, 1.09]               | 0.3         | 0.91<br>[0.74, 1.12]               | 0.4          | 0.91<br>[0.75, 1.11]               | 0.4         |
| First Child              | 237 (48%) | <b>1.23</b><br><b>[1.02, 1.48]</b> | <b>0.03</b>  | 1.12<br>[0.94, 1.34]               | 0.2         | <b>1.27</b><br><b>[1.04, 1.56]</b> | <b>0.02</b>  | 1.18<br>[0.97, 1.43]               | 0.1         |
| IgE-FA                   | 36 (7.3%) | 0.81<br>[0.56, 1.18]               | 0.3          | 0.79<br>[0.55, 1.15]               | 0.2         | 0.69<br>[0.45, 1.05]               | 0.08         | 0.72<br>[0.48, 1.08]               | 0.1         |
| Family History of IgE-FA | 81 (16%)  | 1.03<br>[0.79, 1.35]               | 0.8          | 1.15<br>[0.90, 1.47]               | 0.3         | 0.86<br>[0.64, 1.15]               | 0.3          | 1.11<br>[0.85, 1.45]               | 0.4         |
| FPIAP                    | 88 (18%)  | 1.02<br>[0.80, 1.31]               | 0.9          | 0.91<br>[0.72, 1.16]               | 0.5         | 1.05<br>[0.80, 1.37]               | 0.7          | 0.91<br>[0.70, 1.18]               | 0.5         |
| Post-2017 Guidelines     | 117 (24%) | 1.16<br>[0.93, 1.43]               | 0.2          | 1.07<br>[0.87, 1.32]               | 0.5         | 1.21<br>[0.96, 1.53]               | 0.1          | 1.04<br>[0.83, 1.31]               | 0.7         |

\* All variables above were used in model for multivariable analysis of allergen introduction
